# Supplementary material for: Push Notifications From a Mobile App to Improve the Body Composition of Overweight or Obese Women: Randomized Controlled Trial
Source: PubMed Central journal article supplement (PMC7055755; doi:10.2196/13747), 2020-02-12

# Multimedia Appendix 2. Intranet developed for the study

Effectiveness of PUSH notifications from a mobile app for improving the body composition of overweight or obese women: Randomized Controlled Trial.

Hernández-Reyes, A. *et al.* 2019.

Search... 

- Home
- Pacientes 
- Historial 
- Actividad física 
- Autocontrol 
- Notificaciones 
- TIPS 

## Home



Pacientes 

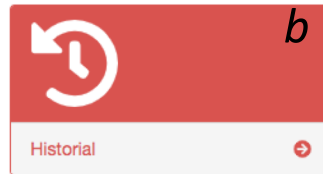

Historial 



Actividad física 



Notificaciones 

- Translation to English
- a) Patients
  - b) Clinical history
  - c) Physical activity
  - d) PUSH notifications

# Pacientes

Nuevo Paciente

Enviar Notificación

Seleccionar TIP Autocontrol

Gestión Pacientes

Show 100 entries

Search:

| HC AF                         | Nombre paciente | Tipo | Fecha Última Notificación | Código                                 | Contraseña | Instance                               | clevertapID |
|-------------------------------|-----------------|------|---------------------------|----------------------------------------|------------|----------------------------------------|-------------|
| <a href="#">Resumen Datos</a> | [Redacted]      | GI   |                           | access data to the APP from smartphone |            | Integration access data with clevertap |             |
| <a href="#">Resumen Datos</a> |                 | GI   | 2019-03-27                |                                        |            |                                        |             |
| <a href="#">Resumen Datos</a> |                 | GI   |                           |                                        |            |                                        |             |
| <a href="#">Resumen Datos</a> |                 | GC   |                           |                                        |            |                                        |             |

## Actividad Física

Nueva Actividad

**Paciente**  
Selecciona Paciente

**Fecha**  
[Calendar icon]

**Mes / Semana**  
Mes / Semana

**N° Pasos**  
N° Pasos

**Distancia**  
Distancia

**Km / h**  
Km / h

**Tiempo**  
Tiempo

**Promedio / mes**  
Promedio / mes

**Enviar**

The menu of physical activity from the intranet is managed directly by the researcher or health care provider, once the Accupedo data has been verified on the patient's mobile.

# Autocontrol

The AUTOCONTROL menu allows the researcher and health professional to access the following information: prescribed diet fulfilled yes or no, physical activity prescribed yes or no and body weight at home (measured on the home scale). This information is used in the intervention group.

Datos enviados

Show  entries

Search:

| fecha      | Paciente | Dieta | Actividad Física | Peso |  |
|------------|----------|-------|------------------|------|--|
| 2019-03-21 |          | no    | si               | 64,2 |  |
| 2019-03-06 |          | no    | no               | 64,6 |  |
| 2019-03-06 |          | no    | no               | 64,6 |  |
| 2019-02-27 |          | si    | si               | 64,7 |  |
| 2019-02-27 |          | si    | si               | 64,7 |  |
| 2019-02-27 |          | si    | si               | 64,7 |  |
| 2019-02-20 |          | si    | si               | 65   |  |
| 2019-02-20 |          | si    | si               | 65   |  |
| 2019-02-13 |          | si    | si               | 64,7 |  |
| 2019-02-13 |          | si    | si               | 64,7 |  |

Search...

- Home
- Pacientes ▾
- Historial ▾
- Actividad física ▾
- Autocontrol ▾
- Notificaciones ▾
  - Listado Notificaciones enviadas
  - Nuevo Mensaje
  - Listado Mensajes
  - Subir fichero

## Notificaciones

Notificaciones enviadas

Show  entries Search:

| fecha <input type="checkbox"/> | Paciente <input type="checkbox"/> | Mensaje <input type="checkbox"/> | Respuesta <input type="checkbox"/> | <input type="checkbox"/>         |
|--------------------------------|-----------------------------------|----------------------------------|------------------------------------|----------------------------------|
| 2019-03-27                     | Alberto Hernández                 | Ha...                            | Si                                 | <input type="button" value="🗑"/> |
| 2019-03-27                     |                                   |                                  |                                    | <input type="button" value="🗑"/> |
| 2019-03-27                     |                                   |                                  |                                    | <input type="button" value="🗑"/> |
| 2019-03-27                     |                                   |                                  |                                    | <input type="button" value="🗑"/> |

the message sent to the patient is chosen from the previously established library.

the message sent to the patient is chosen from the previously established library.

in this section the researcher can check whether the patient has responded or not to the PUSH

# Dashboard

- Crashlytics
- Performance
- Test Lab

We have changed the way we track sessions, which may impact your session-related metrics. [Learn more](#)

## Analytics

- Dashboard
- Events
- Conversions
- Audiences
- Funnels
- User Properties
- Latest Release
- Retention
- StreamView
- DebugView

Add Filter +

in the integration with google analytics and firebase the analysis of user behavior in relation to the use of the APP and response to PUSH notifications is carried out

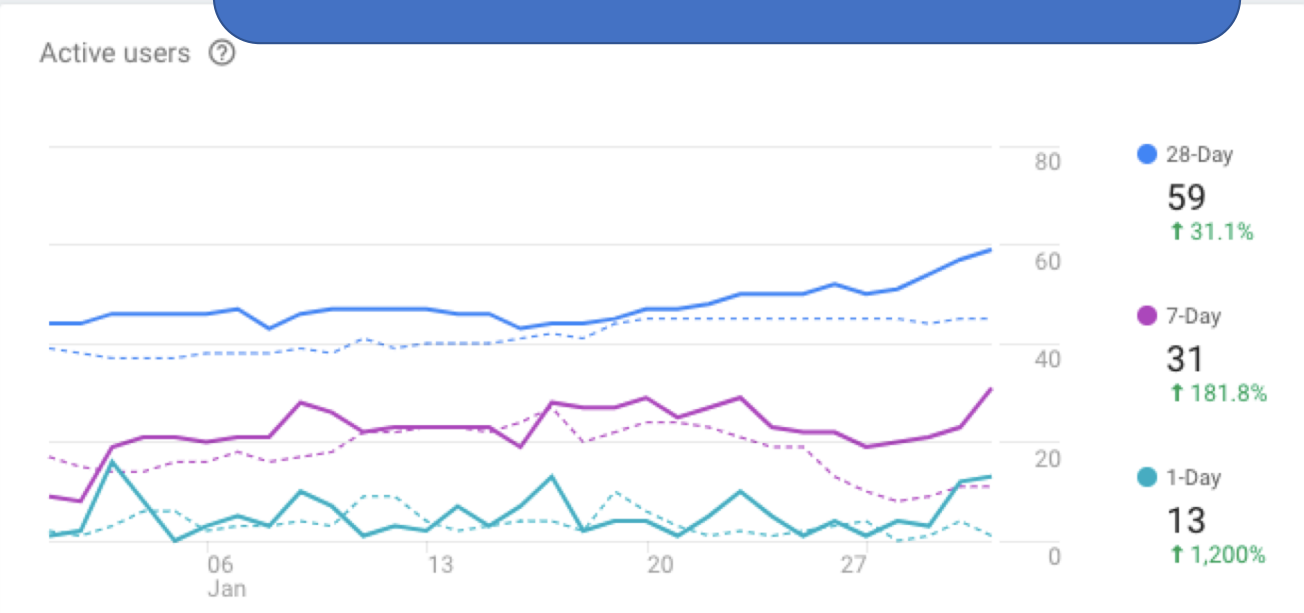

Supplement: mhealth_v8i2e13747_app3.pdf [file mhealth_v8i2e13747_app3.pdf]
